# Supplementary material for: Time-restricted eating with or without low-carbohydrate diet reduces visceral fat and improves metabolic syndrome: A randomized trial
Source: PubMed Central journal article supplement — Cell Rep Med. 2022 Oct 10;3(10):100777. doi: 10.1016/j.xcrm.2022.100777 (PMC9589024; doi:10.1016/j.xcrm.2022.100777), 2022-10-10
Supplement: mmc1.pdf [file mmc1.pdf]

**Cell Reports Medicine, Volume 3**

**Supplemental information**

**Time-restricted eating with or without low-carbohydrate diet reduces visceral fat and improves metabolic syndrome: A randomized trial**

**Mingqian He, Jingya Wang, Qian Liang, Meng Li, Hui Guo, Yue Wang, Cuomu Deji, Jing Sui, Ya-wen Wang, Yufeng Liu, Yixuan Zheng, Buyue Qian, Huaixi Chen, Mao Ma, Shi Su, Hui Geng, Wen-xu Zhou, Xiaoxiao Guo, Wen-zhi Zhu, Meng Zhang, Ziyi Chen, Patrick C.N. Rensen, Chi-chung Hui, Yanan Wang, and Bingyin Shi**

1

**Table S1. Baseline characteristics of participants**

|                                                        | LCD<br>N = 55 | TRE<br>N = 55 | Both<br>N = 52 | p value |
|--------------------------------------------------------|---------------|---------------|----------------|---------|
| <b>Drug treatment (number, n%)</b>                     |               |               |                | 0.252   |
| Hypotensive drugs                                      | 9 (16.4)      | 12 (21.8)     | 5 (9.6)        |         |
| Lipid-lowering drugs                                   | 2 (3.6)       | 4 (7.3)       | 0 (0.0)        |         |
| Urate-lowering drugs                                   | 3 (5.5)       | 3 (5.5)       | 5 (9.6)        |         |
| Oral hypoglycemic drugs                                | 8 (14.5)      | 2 (3.6)       | 4 (7.7)        |         |
| Insulin                                                | 2 (3.6)       | 2 (3.6)       | 1 (1.9)        |         |
| <b>Complicating metabolic disease<br/>(number, n%)</b> |               |               |                | 0.539   |
| Hypertension                                           | 12 (21.8)     | 17 (30.9)     | 8 (15.4)       |         |
| Coronary heart disease                                 | 2 (3.6)       | 2 (3.6)       | 1 (1.9)        |         |
| Arthrolithiasis                                        | 4 (7.3)       | 3 (5.5)       | 6 (11.5)       |         |
| Type 2 diabetes                                        | 8 (14.5)      | 3 (5.5)       | 6 (11.5)       |         |

2 LCD, low-carbohydrate diet; TRE, time-restricted eating; Both, combination treatment.

3 Differences between treatment arms (LCD, TRE and Both) were tested by Chi-square test.

4 Related to Table 1.

5

6

**Table S2. Baseline characteristics of early TRE and late TRE subgroups**

|                                               | TRE            |                | p     | Both          |                | p     |
|-----------------------------------------------|----------------|----------------|-------|---------------|----------------|-------|
|                                               | eTRE (N = 38)  | ITRE (N = 17)  | value | eTRE (N = 32) | ITRE (N = 20)  | value |
| Gender male/female                            | 23/15          | 12/5           | 0.473 | 22/10         | 15/5           | 0.628 |
| Age (years)                                   | 43.7 ± 1.6     | 41.6 ± 2.9     | 0.501 | 40.6 ± 1.6    | 36.5 ± 1.8     | 0.095 |
| Meal eating window (hours)                    | 10.3 ± 0.4     | 10.5 ± 0.4     | 0.824 | 10.9 ± 0.3    | 10.3 ± 0.4     | 0.118 |
| Daily carbohydrate intake (g)                 | 341 ± 18       | 365 ± 33       | 0.499 | 352 ± 29      | 375 ± 35       | 0.607 |
| Weight (kg)                                   | 84.2 ± 2.4     | 85.7 ± 3.6     | 0.725 | 84.7 ± 2.3    | 85.0 ± 3.1     | 0.935 |
| BMI (kg/m <sup>2</sup> )                      | 29.7 ± 0.5     | 29.2 ± 0.9     | 0.639 | 29.1 ± 0.6    | 28.8 ± 0.8     | 0.808 |
| Waist circumference (cm)                      | 96.8 ± 1.4     | 97.0 ± 2.6     | 0.930 | 94.8 ± 1.4    | 94.4 ± 1.5     | 0.819 |
| Hip circumference (cm)                        | 104.7 ± 1.2    | 104.1 ± 1.3    | 0.773 | 104.1 ± 1.3   | 104.1 ± 2.1    | 0.987 |
| Waist-to-hip ratio (WHR)                      | 0.93 ± 0.01    | 0.95 ± 0.02    | 0.462 | 0.91 ± 0.01   | 0.92 ± 0.02    | 0.611 |
| Body fat mass (kg)                            | 33.7 ± 1.1     | 32.3 ± 1.6     | 0.496 | 33.3 ± 1.0    | 31.8 ± 1.5     | 0.374 |
| Body muscle mass (kg)                         | 31.2 ± 1.1     | 32.6 ± 1.7     | 0.477 | 31.5 ± 1.1    | 32.7 ± 1.4     | 0.506 |
| Subcutaneous fat area (SFA, cm <sup>2</sup> ) | 270 ± 11       | 270 ± 19       | 0.990 | 256 ± 10      | 254 ± 18       | 0.902 |
| Visceral fat area (VFA, cm <sup>2</sup> )     | 102 ± 6        | 113 ± 8        | 0.321 | 97 ± 5        | 94 ± 7         | 0.681 |
| Hemoglobin A1c (HbA1c, %)                     | 5.6 (0.6)      | 5.7 (0.6)      | 0.784 | 5.6 (0.7)     | 5.6 (1.1)      | 0.445 |
| Fasting blood glucose (mmol/L)                | 5.05 (1.16)    | 5.05 (0.69)    | 0.579 | 5.01 (1.05)   | 5.19 (1.66)    | 0.735 |
| Fasting insulin (mIU/L)                       | 27.8 (21.1)    | 32.8 (19.9)    | 0.344 | 27.0 (13.9)   | 30.6 (57.6)    | 0.337 |
| C-peptide (pg/mL)                             | 1696.1 ± 131.9 | 1580.0 ± 137.9 | 0.877 | 1570.7 ± 84.7 | 1781.4 ± 185.6 | 0.250 |
| HOMA-IR                                       | 6.70 (6.55)    | 7.64 (6.58)    | 0.202 | 6.79 (4.05)   | 7.58 (14.00)   | 0.829 |
| HOMA-IS                                       | 0.21 (0.23)    | 0.14 (0.12)    | 0.177 | 0.16 (0.10)   | 0.16 (0.17)    | 0.836 |
| QUICKI                                        | 0.29 (0.04)    | 0.29 (0.02)    | 0.236 | 0.29 (0.03)   | 0.29 (0.05)    | 0.463 |
| Uric acid (UA, μmol/L)                        | 383 ± 15       | 387 ± 26       | 0.877 | 429 ± 23      | 395 ± 18       | 0.298 |
| Total cholesterol (mmol/L)                    | 4.67 ± 0.16    | 4.95 ± 0.20    | 0.309 | 4.82 ± 0.18   | 4.58 ± 0.19    | 0.384 |
| LDL-c (mmol/L)                                | 2.88 ± 0.14    | 3.28 ± 0.19    | 0.108 | 3.15 ± 0.17   | 2.85 ± 0.16    | 0.235 |
| Triglycerides (TG, mmol/L)                    | 2.10 (1.52)    | 2.31 (1.77)    | 0.439 | 1.92 (1.92)   | 2.43 (3.63)    | 0.776 |
| HDL-c (mmol/L)                                | 1.11 ± 0.04    | 1.08 ± 0.05    | 0.663 | 1.07 ± 0.04   | 1.01 ± 0.05    | 0.378 |
| TG/HDL                                        | 1.77 (1.85)    | 2.24 (1.99)    | 0.412 | 1.89 (2.61)   | 2.32 (4.43)    | 0.749 |
| Systolic blood pressure (mmHg)                | 136 ± 3        | 137 ± 4        | 0.857 | 132 ± 3       | 129 ± 4        | 0.558 |
| Diastolic blood pressure (mmHg)               | 86 ± 2         | 89 ± 3         | 0.407 | 86 ± 2        | 81 ± 2         | 0.091 |

2 TRE, time-restricted eating; Both, combination treatment; eTRE, early TRE; ITRE, late TRE;  
3 BMI, body mass index; HOMA-IR, homeostasis model assessment insulin resistance; HOMA-  
4 IS, homeostatic model assessment of insulin sensitivity; QUICKI, quantitative insulin-sensitivity  
5 check index; LDL-c, low-density lipoprotein cholesterol; HDL-c, high-density lipoprotein  
6 cholesterol. All data are presented as the mean ± standard error of the mean (SEM) for normal  
7 distribution or median (interquartile range) for abnormal distribution. Differences between the  
8 eTRE and ITRE subgroups were tested by two sample dependent T test or Mann-Whitney U  
9 test. Related to Table 1.

**Table S3. Food intake among participants who completed the intervention**

|                                                                            | LCD                      | TRE                    | Both                     | p value for pairwise comparison |              |              |
|----------------------------------------------------------------------------|--------------------------|------------------------|--------------------------|---------------------------------|--------------|--------------|
|                                                                            | N = 47                   | N = 44                 | N = 44                   | LCD vs. TRE                     | LCD vs. Both | TRE vs. Both |
| <b>Staple food- rice</b>                                                   |                          |                        |                          |                                 |              |              |
| Baseline                                                                   | 450 (400)                | 600 (750)              | 475 (563)                |                                 |              |              |
| Follow-up                                                                  | 200 (300) <sup>***</sup> | 450 (550)              | 225 (388) <sup>***</sup> |                                 |              |              |
| △                                                                          | -250 (475)               | 0 (413)                | -273 (700)               | <b>0.002</b>                    | 0.424        | 0.068        |
| <b>Staple food- wheat flour</b>                                            |                          |                        |                          |                                 |              |              |
| Baseline                                                                   | 600 (750)                | 700 (906)              | 750 (1088)               |                                 |              |              |
| Follow-up                                                                  | 200 (363) <sup>***</sup> | 500 (400) <sup>*</sup> | 150 (213) <sup>***</sup> |                                 |              |              |
| △                                                                          | -350 (800)               | -100 (1019)            | -575 (1050)              | 0.051                           | 0.350        | <b>0.005</b> |
| <b>Staple food- coarse grain and field crop (corn, oat, sorghum, etc.)</b> |                          |                        |                          |                                 |              |              |
| Baseline                                                                   | 150 (300)                | 50 (369)               | 100 (309)                |                                 |              |              |
| Follow-up                                                                  | 0 (150) <sup>**</sup>    | 0 (100) <sup>**</sup>  | 0 (94) <sup>***</sup>    |                                 |              |              |
| △                                                                          | 0 (200)                  | 0 (338)                | 0 (250)                  | 0.789                           | 0.811        | 0.623        |
| <b>Staple food- tuber vegetable (potato, batata, yam, taro, etc.)</b>      |                          |                        |                          |                                 |              |              |
| Baseline                                                                   | 200 (300)                | 100 (275)              | 0 (169)                  |                                 |              |              |
| Follow-up                                                                  | 50 (200) <sup>*</sup>    | 0 (150)                | 0 (150)                  |                                 |              |              |
| △                                                                          | -50 (200)                | 0 (100)                | 0 (144)                  | 0.287                           | 0.044        | 0.350        |
| <b>Staple food- starch and derived products (vermicelli, etc.)</b>         |                          |                        |                          |                                 |              |              |
| Baseline                                                                   | 0 (100)                  | 0 (100)                | 50 (150)                 |                                 |              |              |
| Follow-up                                                                  | 0 (50)                   | 0 (100)                | 0 (100)                  |                                 |              |              |
| △                                                                          | 0 (50)                   | 0 (62)                 | 0 (130)                  | 0.664                           | 0.467        | 0.351        |
| <b>Pastry- bread, cake, cookie, etc.</b>                                   |                          |                        |                          |                                 |              |              |
| Baseline                                                                   | 50 (200)                 | 0 (100)                | 25 (150)                 |                                 |              |              |
| Follow-up                                                                  | 0 (50) <sup>**</sup>     | 0 (138)                | 0 (0) <sup>**</sup>      |                                 |              |              |
| △                                                                          | -50 (150)                | 0 (100)                | 0 (100)                  | <b>0.020</b>                    | 0.864        | <b>0.016</b> |
| <b>Meat- pork, beef and lamb</b>                                           |                          |                        |                          |                                 |              |              |
| Baseline                                                                   | 350 (300)                | 350 (588)              | 350 (550)                |                                 |              |              |
| Follow-up                                                                  | 300 (300)                | 350 (588)              | 375 (838) <sup>**</sup>  |                                 |              |              |
| △                                                                          | 0 (350)                  | 0 (388)                | 100 (438)                | 0.733                           | <b>0.006</b> | <b>0.004</b> |
| <b>Meat- processed meat (bacon, sausage, etc.)</b>                         |                          |                        |                          |                                 |              |              |
| Baseline                                                                   | 0 (50)                   | 0 (8)                  | 0 (15)                   |                                 |              |              |
| Follow-up                                                                  | 0 (50)                   | 0 (50)                 | 0 (0)                    |                                 |              |              |
| △                                                                          | 0 (25)                   | 0 (0)                  | 0 (0)                    | 0.242                           | 0.627        | 0.437        |
| <b>Meat- animal innards</b>                                                |                          |                        |                          |                                 |              |              |
| Baseline                                                                   | 0 (0)                    | 0 (0)                  | 0 (0)                    |                                 |              |              |
| Follow-up                                                                  | 0 (0)                    | 0 (0)                  | 0 (0)                    |                                 |              |              |
| △                                                                          | 0 (0)                    | 0 (0)                  | 0 (0)                    | 0.120                           | 0.883        | 0.161        |
| <b>Aquatic product- fish, crab, shrimp, shellfish, molluscs, etc.</b>      |                          |                        |                          |                                 |              |              |
| Baseline                                                                   | 50 (150)                 | 100 (200)              | 0 (50)                   |                                 |              |              |
| Follow-up                                                                  | 100 (200)                | 0 (150) <sup>*</sup>   | 0 (150)                  |                                 |              |              |
| △                                                                          | 0 (150)                  | 0 (100)                | 0 (100)                  | <b>0.011</b>                    | 0.980        | <b>0.009</b> |
| <b>Poultry- chicken, duck, pigeon, etc.</b>                                |                          |                        |                          |                                 |              |              |

|                                                                                                  |            |            |             |       |       |       |
|--------------------------------------------------------------------------------------------------|------------|------------|-------------|-------|-------|-------|
| Baseline                                                                                         | 100 (200)  | 50 (150)   | 0 (138)     |       |       |       |
| Follow-up                                                                                        | 100 (263)  | 50 (200)   | 100 (200)   |       |       |       |
| △                                                                                                | 0 (150)    | 0 (150)    | 0 (175)     | 0.358 | 0.763 | 0.254 |
| <b>Egg-</b> hen's egg, duck's egg, preserved egg, salted egg, etc.                               |            |            |             |       |       |       |
| Baseline                                                                                         | 300 (150)  | 350 (475)  | 200 (200)   |       |       |       |
| Follow-up                                                                                        | 350 (200)  | 350 (313)  | 290 (356)   |       |       |       |
| △                                                                                                | 0 (325)    | -25 (408)  | 0 (375)     | 0.178 | 0.978 | 0.235 |
| <b>Milk and milk products-</b> milk, yogurt, etc.                                                |            |            |             |       |       |       |
| Baseline                                                                                         | 540 (1260) | 450 (1014) | 600 (1038)  |       |       |       |
| Follow-up                                                                                        | 700 (1400) | 500 (838)  | 600 (928)   |       |       |       |
| △                                                                                                | 0 (1200)   | 0 (434)    | 0 (838)     | 0.758 | 0.582 | 0.299 |
| <b>Milk and milk products-</b> milk powder, cheese, etc.                                         |            |            |             |       |       |       |
| Baseline                                                                                         | 0 (0)      | 0 (0)      | 0 (0)       |       |       |       |
| Follow-up                                                                                        | 0 (0)      | 0 (0)      | 0 (0)       |       |       |       |
| △                                                                                                | 0 (0)      | 0 (0)      | 0 (0)       | 0.607 | 0.262 | 0.642 |
| <b>Beans and legume products-</b> soybean                                                        |            |            |             |       |       |       |
| Baseline                                                                                         | 0 (150)    | 0 (200)    | 0 (150)     |       |       |       |
| Follow-up                                                                                        | 0 (250)    | 0 (100)    | 0 (100)     |       |       |       |
| △                                                                                                | 0 (175)    | 0 (100)    | 0 (164)     | 0.171 | 0.763 | 0.160 |
| <b>Beans and legume products-</b> tofu, soybean curd sheet, soybean curd slab and oily bean curd |            |            |             |       |       |       |
| Baseline                                                                                         | 100 (150)  | 100 (200)  | 33 (100)    |       |       |       |
| Follow-up                                                                                        | 100 (225)  | 65 (281)   | 50 (150)    |       |       |       |
| △                                                                                                | 0 (150)    | 0 (150)    | 0 (226)     | 0.438 | 0.345 | 0.806 |
| <b>Vegetables-</b> dark vegetables                                                               |            |            |             |       |       |       |
| Baseline                                                                                         | 500 (1200) | 650 (738)  | 613 (1100)  |       |       |       |
| Follow-up                                                                                        | 600 (110)  | 600 (1113) | 700 (1113)  |       |       |       |
| △                                                                                                | 100 (725)  | 0 (998)    | -18 (975)   | 0.570 | 0.247 | 0.613 |
| <b>Vegetables-</b> light vegetables                                                              |            |            |             |       |       |       |
| Baseline                                                                                         | 350 (1200) | 350 (1163) | 350 (538)   |       |       |       |
| Follow-up                                                                                        | 450 (850)  | 375 (813)  | 600 (675)   |       |       |       |
| △                                                                                                | 0 (650)    | -50 (653)  | 120 (838)   | 0.279 | 0.352 | 0.073 |
| <b>Phycomycetes-</b> mushrooms, seaweed, porphyra, etc.                                          |            |            |             |       |       |       |
| Baseline                                                                                         | 50 (150)   | 50 (100)   | 50 (125)    |       |       |       |
| Follow-up                                                                                        | 100 (225)  | 0 (100)    | 100 (200)*  |       |       |       |
| △                                                                                                | 0 (105)    | 0 (100)    | 25 (150)    | 0.299 | 0.396 | 0.084 |
| <b>Fruits-</b> apple, pear, peach, cherry, grapefruit, kiwifruit, etc.                           |            |            |             |       |       |       |
| Baseline                                                                                         | 350 (950)  | 350 (675)  | 450 (694)   |       |       |       |
| Follow-up                                                                                        | 200 (400)* | 300 (425)* | 200 (388)** |       |       |       |
| △                                                                                                | 0 (500)    | -75 (425)  | -200 (613)  | 0.927 | 0.368 | 0.268 |
| <b>Fruits-</b> mango, pineapple, etc.                                                            |            |            |             |       |       |       |
| Baseline                                                                                         | 0 (0)      | 0 (0)      | 0 (0)       |       |       |       |
| Follow-up                                                                                        | 0 (0)      | 0 (0)      | 0 (0)       |       |       |       |
| △                                                                                                | 0 (0)      | 0 (0)      | 0 (0)       | 0.824 | 0.734 | 0.576 |
| <b>Fruits-</b> watermelon, etc.                                                                  |            |            |             |       |       |       |

|                                                                 |           |          |          |       |       |       |
|-----------------------------------------------------------------|-----------|----------|----------|-------|-------|-------|
| Baseline                                                        | 0 (50)    | 0 (0)    | 0 (0)    |       |       |       |
| Follow-up                                                       | 0 (0)     | 0 (0)    | 0 (0)    |       |       |       |
| △                                                               | 0 (0)     | 0 (0)    | 0 (0)    | 0.658 | 0.238 | 0.105 |
| <b>Nuts-</b> peanut, sunflower seed, walnut, pumpkin seed, etc. |           |          |          |       |       |       |
| Baseline                                                        | 35 (175)  | 0 (169)  | 50 (150) |       |       |       |
| Follow-up                                                       | 140 (300) | 63 (150) | 63 (200) |       |       |       |
| △                                                               | 0 (185)   | 0 (150)  | 0 (181)  | 0.404 | 0.275 | 0.799 |
| <b>Alcohol-</b> low-alcohol liquor ( $\leq 38^\circ$ )          |           |          |          |       |       |       |
| Baseline                                                        | 0 (0)     | 0 (0)    | 0 (0)    |       |       |       |
| Follow-up                                                       | 0 (0)     | 0 (0)    | 0 (0)    |       |       |       |
| △                                                               | 0 (0)     | 0 (0)    | 0 (0)    | 0.680 | 0.171 | 0.100 |
| <b>Alcohol-</b> high-alcohol liquor ( $> 38^\circ$ )            |           |          |          |       |       |       |
| Baseline                                                        | 0 (0)     | 0 (50)   | 0 (0)    |       |       |       |
| Follow-up                                                       | 0 (0)     | 0 (50)   | 0 (0)    |       |       |       |
| △                                                               | 0 (0)     | 0 (38)   | 0 (0)    | 0.321 | 0.408 | 0.876 |
| <b>Alcohol-</b> beer                                            |           |          |          |       |       |       |
| Baseline                                                        | 0 (0)     | 0 (0)    | 0 (0)    |       |       |       |
| Follow-up                                                       | 0 (0)     | 0 (0)    | 0 (0)    |       |       |       |
| △                                                               | 0 (0)     | 0 (0)    | 0 (0)    | 0.405 | 0.514 | 0.183 |
| <b>Alcohol-</b> fruit wine                                      |           |          |          |       |       |       |
| Baseline                                                        | 0 (0)     | 0 (0)    | 0 (0)    |       |       |       |
| Follow-up                                                       | 0 (0)     | 0 (0)    | 0 (0)    |       |       |       |
| △                                                               | 0 (0)     | 0 (0)    | 0 (0)    | 0.169 | 0.195 | 0.559 |

1 LCD, low-carbohydrate diet; TRE, time-restricted eating; Both, combination treatment. All data  
2 were presented as the median (interquartile range) for abnormal distribution. Analyses were  
3 conducted in participants who completed the intervention. Change scores from baseline were  
4 represented by “ $\Delta$ ” in the table. After 3 months of intervention, pairwise comparisons of change  
5 scores between the groups (e.g., TRE vs. LCD, TRE vs. Both, LCD vs. Both) were evaluated  
6 by Mann-Whitney U test. \* $p < 0.05$ , \*\* $p < 0.01$ , \*\*\* $p < 0.001$ : significant differences compared  
7 with baseline (paired Wilcoxon test). Related to STAR Methods.

8

1  
2

**Table S4. Physical activity analysis among participants who completed the intervention**

|                                                 |           | LCD         | TRE         | Both        |
|-------------------------------------------------|-----------|-------------|-------------|-------------|
|                                                 |           | N = 47      | N = 44      | N = 44      |
| <b>Intense physical activity time (h/week)</b>  | Baseline  | 0.0 (0.3)   | 0.0 (0.6)   | 0.0 (1.0)   |
|                                                 | Follow-up | 0.0 (0.8)   | 0.0 (0.5)   | 0.0 (0.8)   |
|                                                 | △         | 0.0 (0.0)   | 0.0 (0.0)   | 0.0 (0.2)   |
| <b>Moderate physical activity time (h/week)</b> | Baseline  | 0.0 (1.3)   | 0.0 (0.1)   | 0.0 (0.5)   |
|                                                 | Follow-up | 0.0 (1.0)   | 0.0 (0.0)   | 0.0 (1.0)   |
|                                                 | △         | 0.0 (0.0)   | 0.0 (0.0)   | 0.0 (0.6)   |
| <b>Walking time (h/week)</b>                    | Baseline  | 2.3 (3.8)   | 3.5 (4.0)   | 3.5 (3.6)   |
|                                                 | Follow-up | 2.5 (4.8)   | 2.5 (2.4)   | 2.6 (4.8)   |
|                                                 | △         | 0.0 (2.3)   | 0.0 (3.2)   | -0.5 (1.5)  |
| <b>Sitting time (h/week)</b>                    | Baseline  | 35.0 (31.5) | 28.6 (25.7) | 33.8 (35.0) |
|                                                 | Follow-up | 35.0 (25.7) | 35.0 (25.7) | 35.0 (34.4) |
|                                                 | △         | 0.0 (7.0)   | 0.0 (16.3)  | 0.0 (16.3)  |

3 LCD, low-carbohydrate diet; TRE, time-restricted eating Both, combination treatment. All data  
 4 were presented as the median (interquartile range) for abnormal distribution. Analyses were  
 5 conducted in participants who completed the intervention. Change scores from baseline were  
 6 represented by “Δ” in the table. After 3 months of intervention, pairwise comparisons of baseline  
 7 and change scores between the groups (e.g., TRE vs. LCD, TRE vs. Both, LCD vs. Both) were  
 8 evaluated by Mann-Whitney U test. The significant difference as compared with baseline were  
 9 evaluated by paired Wilcoxon test for each group. No significant difference was found either  
 10 within each group or between groups. Related to STAR Methods.  
 11

1

**Table S5. Change in primary outcomes between participants with or without more than 50% dietary log records**

|                                                    | LCD (N = 55)              |                           |            | TRE (N = 55)              |                           |            | Both (N = 52)             |                           |            |
|----------------------------------------------------|---------------------------|---------------------------|------------|---------------------------|---------------------------|------------|---------------------------|---------------------------|------------|
|                                                    | Records ≥ 50%<br>(N = 19) | Records < 50%<br>(N = 36) | p<br>value | Records ≥ 50%<br>(N = 19) | Records < 50%<br>(N = 36) | p<br>value | Records ≥ 50%<br>(N = 23) | Records < 50%<br>(N = 29) | p<br>value |
| Days of dietary log (during<br>the first 2 weeks)  | 14 (5)                    | 1 (2)                     | <0.001     | 14 (4)                    | 1 (2)                     | <0.001     | 14 (2)                    | 0 (1)                     | <0.001     |
| Δ Weight (kg)                                      | -2.2 ± 0.9                | -2.3 ± 0.5                | 0.908      | -3.1 ± 0.7                | -3.7 ± 0.7                | 0.540      | -5.4 ± 0.9                | -4.9 ± 0.8                | 0.739      |
| Δ Visceral fat area<br>(VFA, cm <sup>2</sup> )     | -7 ± 7                    | 12 ± 7                    | 0.089      | -11 ± 4                   | -14 ± 7                   | 0.738      | -9 ± 5                    | -10 ± 5                   | 0.842      |
| Δ Subcutaneous fat area<br>(SFA, cm <sup>2</sup> ) | -29 ± 9                   | -21 ± 6                   | 0.468      | -24 ± 13                  | -24 ± 10                  | 0.994      | -35 ± 7                   | -15 ± 13                  | 0.235      |

2 LCD, low-carbohydrate diet; TRE, time-restricted eating; Both, combination treatment. During the first 2-week of intervention period, when participants were  
3 trained for diet schemes, daily dietary log was monitored, analyzed and clustered into two groups based on the record time more than 7 days (≥ 50%) or not (<  
4 50%). All data were presented as mean ± standard error of the mean (SEM) for normally distributed variables or the median (interquartile range) for abnormal  
5 distribution (Days of dietary log). Change scores from baseline were represented by “Δ” in the table. Analyses were conducted using all participants (intention-  
6 to-treat), using a multiple imputation approach for missing data. After 3 months of intervention, pairwise comparisons of change scores between the valid and  
7 invalid record subgroups were evaluated by t test or Mann-Whitney U test. Related to STAR Methods.

8



1  
2

**Table S6. Change in body composition and metabolic risk markers after 3 months of the intervention between early TRE and late TRE subgroups.**

|                                                      |               | TRE                     |                         | p value      | Both                    |                         | p value      |
|------------------------------------------------------|---------------|-------------------------|-------------------------|--------------|-------------------------|-------------------------|--------------|
|                                                      |               | eTRE (N = 38)           | ITRE (N = 17)           |              | eTRE (N = 32)           | ITRE (N = 20)           |              |
| <b>Days of adherence (days)</b>                      |               | 61.4 ± 4.0              | 74.9 ± 2.7              | <b>0.031</b> | 57.0 ± 3.9              | 58.7 ± 5.3              | 0.798        |
| <b>Willingness to continue the diet (n/total, %)</b> |               | 29/30 (97)              | 14/14 (100)             | 0.490        | 20/27 (74)              | 16/17 (94)              | 0.093        |
| <b>Meal eating window (hours)</b>                    | Follow-up     | 6.4 ± 0.4***            | 6.9 ± 0.3***            |              | 6.9 ± 0.5***            | 6.6 ± 0.5***            |              |
|                                                      | △             | -4.0 ± 0.6              | -3.6 ± 0.4              | 0.715        | -4.0 ± 0.5              | -3.7 ± 0.7              | 0.726        |
| <b>Daily carbohydrate intake (g)</b>                 | Follow-up     | 315 ± 19                | 356 ± 26                |              | 144 ± 15***             | 133 ± 14***             |              |
|                                                      | △             | -26 ± 18                | -9 ± 22                 | 0.564        | -207 ± 23               | -243 ± 36               | 0.392        |
| <b>Weight (kg)</b>                                   | 1 M Follow-up | 81.6 ± 2.7 <sup>b</sup> | 85.7 ± 3.6 <sup>b</sup> |              | 81.5 ± 2.3 <sup>b</sup> | 83.1 ± 2.9 <sup>a</sup> |              |
|                                                      | 1 M △         | -2.4 ± 0.4              | -2.5 ± 0.7              | 0.869        | -3.1 ± 0.5              | -1.9 ± 0.7              | 0.151        |
|                                                      | 2 M Follow-up | 80.4 ± 2.6 <sup>a</sup> | 83.3 ± 3.2 <sup>a</sup> |              | 79.7 ± 2.2 <sup>b</sup> | 81.8 ± 2.9 <sup>b</sup> |              |
|                                                      | 2 M △         | -3.6 ± 0.4              | -4.0 ± 0.7              | 0.599        | -4.9 ± 0.5              | -3.2 ± 0.7              | <b>0.040</b> |
|                                                      | 3 M Follow-up | 79.9 ± 2.8              | 84.0 ± 3.5              |              | 78.9 ± 2.4              | 82.4 ± 2.6              |              |
|                                                      | 3 M △         | -3.3 ± 0.4              | -3.7 ± 0.7              | 0.606        | -5.6 ± 0.5              | -4.2 ± 0.7              | 0.096        |
| <b>BMI (kg/m<sup>2</sup>)</b>                        | Follow-up     | 28.3 ± 0.5***           | 27.7 ± 0.5*             |              | 27.0 ± 0.6***           | 27.5 ± 0.7**            |              |
|                                                      | △             | -1.4 ± 0.3              | -1.6 ± 0.6              | 0.781        | -2.1 ± 0.3              | -1.4 ± 0.4              | 0.148        |
| <b>Waist circumference (cm)</b>                      | Follow-up     | 91.7 ± 1.8***           | 94.9 ± 2.8              |              | 91.0 ± 1.9*             | 92.0 ± 1.8              |              |
|                                                      | △             | -5.1 ± 1.1              | -2.1 ± 2.1              | 0.167        | -3.8 ± 1.5              | -2.4 ± 1.9              | 0.558        |
| <b>Hip circumference (cm)</b>                        | Follow-up     | 103.1 ± 1.1             | 102.9 ± 1.3             |              | 101.0 ± 1.4*            | 100.8 ± 1.5             |              |
|                                                      | △             | -1.7 ± 0.9              | -1.2 ± 1.2              | 0.796        | -3.2 ± 1.2              | -2.3 ± 1.2              | 0.621        |
| <b>Waist-to-hip ratio (WHR)</b>                      | Follow-up     | 0.89 ± 0.01**           | 0.92 ± 0.02             |              | 0.90 ± 0.01             | 0.91 ± 0.02             |              |

|                                                    |           |                  |                |       |                  |                |              |
|----------------------------------------------------|-----------|------------------|----------------|-------|------------------|----------------|--------------|
|                                                    | △         | -0.04 ± 0.01     | -0.02 ± 0.02   | 0.380 | -0.01 ± 0.01     | -0.00 ± 0.01   | 0.838        |
| <b>Body fat mass (kg)</b>                          | Follow-up | 32.4 ± 1.1       | 30.8 ± 1.5     |       | 30.5 ± 1.1**     | 28.5 ± 1.6***  |              |
|                                                    | △         | -1.3 ± 0.8       | -1.4 ± 0.7     | 0.912 | -2.8 ± 0.8       | -3.2 ± 0.7     | 0.703        |
| <b>Body muscle mass (kg)</b>                       | Follow-up | 30.6 ± 1.0       | 32.3 ± 1.5     |       | 30.7 ± 1.0*      | 32.8 ± 1.2     |              |
|                                                    | △         | -0.6 ± 0.3       | -0.4 ± 0.3     | 0.674 | -0.8 ± 0.3       | 0.1 ± 0.4      | 0.061        |
| <b>Subcutaneous fat area (SFA, cm<sup>2</sup>)</b> | Follow-up | 251 ± 13*        | 232 ± 14       |       | 227 ± 13*        | 239 ± 18       |              |
|                                                    | △         | -18 ± 7          | -38 ± 21       | 0.256 | -29 ± 11         | -15 ± 13       | 0.394        |
| <b>Visceral fat area (VFA, cm<sup>2</sup>)</b>     | Follow-up | 88 ± 7*          | 101 ± 8        |       | 88 ± 6*          | 83 ± 7         |              |
|                                                    | △         | -14 ± 6          | -12 ± 8        | 0.872 | -9 ± 4           | -10 ± 6        | 0.856        |
| <b>Hemoglobin A1c (HbA1c, %)</b>                   | Follow-up | 5.5 (0.6)        | 5.6 (0.7)      |       | 5.6 (0.7)        | 5.5 (0.9)      |              |
|                                                    | △         | 0.0 (0.3)        | -0.1 (0.4)     | 0.854 | -0.1 (0.6)       | -0.2 (0.4)     | 0.502        |
| <b>Fasting blood glucose (mmol/L)</b>              | Follow-up | 4.77 (1.07)      | 4.76 (0.94)    |       | 4.83 (1.22)      | 5.23 (1.13)    |              |
|                                                    | △         | -0.15 (1.02)     | -0.22 (0.35)   | 0.863 | -0.32 (0.95)     | -0.15 (0.82)   | 0.457        |
| <b>Fasting insulin (mIU/L)</b>                     | Follow-up | 23.9 (21.0)***   | 29.9 (12.7)*   |       | 16.1 (13.4)**    | 26.4 (34.7)*   |              |
|                                                    | △         | -3.5 (13.2)      | -2.2 (13.6)    | 0.771 | -5.3 (11.0)      | -5.7 (24.6)    | 0.880        |
| <b>C-peptide (pg/mL)</b>                           | Follow-up | 1451.1 ± 108.2** | 1338.5 ± 96.5  |       | 1185.5 ± 74.1*** | 1568.1 ± 127.1 |              |
|                                                    | △         | -245.0 ± 77.5    | -241.5 ± 128.4 | 0.981 | -385.2 ± 76.2    | -213.3 ± 126.4 | 0.221        |
| <b>HOMA-IR</b>                                     | Follow-up | 4.68 (4.51)***   | 6.48 (4.67)**  |       | 3.76 (2.33)***   | 6.78 (5.72)    |              |
|                                                    | △         | -0.84 (4.61)     | -2.15 (4.99)   | 0.548 | -2.40 (4.54)     | -1.65 (7.53)   | 0.229        |
| <b>HOMA-IS</b>                                     | Follow-up | 0.28 (0.51)***   | 0.18 (0.25)*   |       | 0.31 (0.23)***   | 0.24 (0.22)    |              |
|                                                    | △         | 0.05 (0.33)      | 0.03 (0.09)    | 0.629 | 0.14 (0.21)      | 0.04 (0.14)    | <b>0.007</b> |
| <b>QUICKI</b>                                      | Follow-up | 0.31 (0.05)***   | 0.30 (0.03)*   |       | 0.32 (0.03)***   | 0.30 (0.04)    |              |
|                                                    | △         | 0.02 (0.03)      | 0.01 (0.02)    | 0.489 | 0.02 (0.01)      | 0.01 (0.04)    | 0.102        |
| <b>Uric acid (UA, μmol/L)</b>                      | Follow-up | 344 ± 16*        | 347 ± 16*      |       | 370 ± 17**       | 354 ± 18**     |              |

|                                        |           |              |              |       |                |               |       |
|----------------------------------------|-----------|--------------|--------------|-------|----------------|---------------|-------|
|                                        | △         | -39 ± 15     | -40 ± 18     | 0.967 | -58 ± 19       | -41 ± 14      | 0.511 |
| <b>Total cholesterol (mmol/L)</b>      | Follow-up | 4.56 ± 0.15  | 5.30 ± 0.27  |       | 4.93 ± 0.20    | 4.77 ± 0.22   |       |
|                                        | △         | -0.12 ± 0.21 | 0.35 ± 0.26  | 0.201 | 0.11 ± 0.13    | 0.19 ± 0.27   | 0.775 |
| <b>LDL-c (mmol/L)</b>                  | Follow-up | 2.89 ± 0.15  | 3.69 ± 0.25* |       | 3.42 ± 0.19*   | 3.17 ± 0.23   |       |
|                                        | △         | 0.01 ± 0.18  | 0.41 ± 0.19  | 0.180 | 0.28 ± 0.12    | 0.33 ± 0.28   | 0.847 |
| <b>Triglycerides (TG, mmol/L)</b>      | Follow-up | 1.53 (1.65)* | 1.98 (1.56)* |       | 1.40 (1.25)**  | 1.30 (1.76)*  |       |
|                                        | △         | -0.39 (1.33) | -0.30 (1.38) | 0.884 | -0.51 (1.84)   | -0.49 (2.28)  | 0.707 |
| <b>HDL-c (mmol/L)</b>                  | Follow-up | 1.14 ± 0.04  | 1.09 ± 0.05  |       | 1.15 ± 0.04*   | 1.13 ± 0.05*  |       |
|                                        | △         | 0.03 ± 0.04  | 0.01 ± 0.04  | 0.723 | 0.07 ± 0.03    | 0.12 ± 0.04   | 0.327 |
| <b>TG/HDL-c</b>                        | Follow-up | 1.25 (1.63)  | 2.01 (1.29)  |       | 1.23 (1.08)*** | 1.63 (1.82)** |       |
|                                        | △         | -0.31 (1.48) | -0.30 (2.06) | 0.855 | -0.54 (2.07)   | -0.87 (2.64)  | 0.707 |
| <b>Systolic blood pressure (mmHg)</b>  | Follow-up | 136 ± 2      | 139 ± 3      |       | 131 ± 3        | 132 ± 3       |       |
|                                        | △         | 0 ± 2        | 2 ± 3        | 0.590 | -1 ± 2         | 3 ± 3         | 0.367 |
| <b>Diastolic blood pressure (mmHg)</b> | Follow-up | 84 ± 2       | 88 ± 2       |       | 82 ± 2*        | 76 ± 2        |       |
|                                        | △         | -2 ± 2       | -2 ± 2       | 0.895 | -5 ± 2         | -4 ± 2        | 0.873 |

1 TRE, time-restricted eating; Both, combination treatment; eTRE, early TRE; lTRE, late TRE; BMI, body mass index; HOMA-IR, homeostasis model assessment  
2 of insulin resistance; HOMA-IS, homeostatic model assessment of insulin sensitivity; QUICKI, quantitative insulin-sensitivity check index; LDL-c, low-density  
3 lipoprotein cholesterol; HDL-c, high-density lipoprotein cholesterol. All data were presented as mean ± standard error of the mean (SEM) for normally distributed  
4 variables or the median (interquartile range) for abnormal distribution. Change scores from baseline were represented by “Δ” in the table. Analyses were  
5 conducted using all participants (intention-to-treat), using a linear mixed model with randomized dietary intervention as factor to correct for the correlations of  
6 repeated measurements on changes in body weight, and using a multiple imputation approach for other missing data. After 3 months of intervention, pairwise  
7 comparisons of change scores between the eTRE and lTRE subgroups were evaluated by t test or Mann-Whitney U test. <sup>a</sup>p < 0.05, <sup>b</sup>p < 0.001: significant  
8 differences compared with one month before (paired t test); \*p < 0.05, \*\*p < 0.01, \*\*\*p < 0.001: significant differences compared with baseline (paired t test or  
9 paired Wilcoxon test). Related to Table 2.

10  
11

**Table S7. Suggested Food and Menu List**

|                                          |                                                                                                                                                                                                                                                                                                                                                                                                                                                                                                                                                                                                                                                                                                                                                                                                                                                                                                                                                                                                                                                                                                                                                                                                                                                                                                                                                                                                                                                                                                                                                                                                                             |
|------------------------------------------|-----------------------------------------------------------------------------------------------------------------------------------------------------------------------------------------------------------------------------------------------------------------------------------------------------------------------------------------------------------------------------------------------------------------------------------------------------------------------------------------------------------------------------------------------------------------------------------------------------------------------------------------------------------------------------------------------------------------------------------------------------------------------------------------------------------------------------------------------------------------------------------------------------------------------------------------------------------------------------------------------------------------------------------------------------------------------------------------------------------------------------------------------------------------------------------------------------------------------------------------------------------------------------------------------------------------------------------------------------------------------------------------------------------------------------------------------------------------------------------------------------------------------------------------------------------------------------------------------------------------------------|
| <b>Go/Green</b>                          | <p><b>Vegetables:</b><br/>Spinach, Cabbage, Red cabbage, Watercress, Lettuce, Stern lettuce, Bok choy, Coriander, Celery, Leeks, Bitter melon, Cucumber, Garlic, Ginger, Spring onions, Onion, Chili pepper, Green bell Pepper, Red bell pepper, Tomato, Eggplant, Cauliflower, Broccoli, Mushroom, Bean sprouts</p> <p><b>Meat:</b><br/>Pork, Lean meet, Bacon belly, Pig's Trotters , Pork liver, Spareribs, Beef, Mutton, Chicken, Shrimp, Fish</p> <p><b>Soups:</b> excluding any staple food contained in the soup<br/>Egg &amp; vegetable soup, Seaweed soup, Sweet &amp; sour soup , Pork thick soup, Fish ball soup, Meat ball soup</p> <p><b>Fruit and nuts:</b> Coconut, Avocado</p> <p><b>Drinks:</b> Mineral water, Soda water</p> <p><b>Local snacks:</b> excluding any staple food contained in the dish<br/>Vegetable stew with lamb ball, Casserole</p> <p><b>Common vegetarian dishes:</b><br/>Scrambled egg with tomato, Stir fried beancurd with sliced pork &amp; pepper, Sauté eggplant with fish flavor, Sauté leek sprouts &amp; eggs, Stir fried green bean, Stir fried bitter melon, Stir fried mixed greens, Stir fried Chinese broccoli, Sauté string bean</p> <p><b>Common meat dishes:</b><br/>Stir fried shredded pork with sweet and sour sauce, Sauté diced chicken with hot peppers, Sauté diced chicken with peanuts, Stir fried shrimps with bamboo shoots, Beef curry, Chicken curry, Braised common carp, Steamed fish, Braised prawns with soy sauce, Sauté pork in hot sauce, Braised pork with soy sauce, Boiled salted duck, Braised beef with brown sauce, Roast Beijing duck</p> |
| <b>Slow down /Yellow &lt; 300 ml/day</b> | <p><b>Vegetables: (&lt; 50ml/meal, 150 ml/day)</b><br/>Lima bean, Pea, Radish, Carrot, Lotus root, Yam, Sweet corn, Pump, Potato, Sweet potato</p> <p><b>Staple food: (&lt; 50 ml/meal, 150 ml/day)</b><br/>Plain white rice, Fried rice with egg, Sweet potato congee, Rice porridge, Rice noodles</p> <p><b>Fruits and nuts: (&lt; 50 ml/meal, 100 ml/day)</b><br/>Apple, Pear, Peach, Apricot, Orange, Lemon, Grape, Strawberry, Mulberry, Nectarine, Cherry, Watermelon, Papaya, Pomegranate, Persimmon, Guava, Kiwi, Lychee, Pomelo, Mangosteen, Longan, Pineapple, Banana, Mango, Durian, Date, Peanut, Chestnut</p> <p><b>Drinks: (&lt; 50 ml/meal, &lt; 100 ml/day)</b><br/>Soybean milk</p> <p><b>Local Snack: &lt; 50 ml/meal, &lt; 150 ml/day)</b><br/>Extra soft tofu, Cold steamed rice noodle, Mutton blood with rice noodles, Honey glutinous rice</p> <p><b>Common meat dishes: (&lt; 50 ml/meal, &lt; 150 ml/day)</b><br/>Pork filllets with sweet &amp; sour sauce, Sauté chops with sweet &amp; sour sauce, Crisp fried spareribs</p>                                                                                                                                                                                                                                                                                                                                                                                                                                                                                                                                                                    |
| <b>Stop/Red</b>                          | <p><b>Staple food:</b><br/>Clay oven rolls, Fried bread stick, Steamed buns, Boiled dumplings, Steamed dumplings, Sliced noodles, Sesame paste noodles, Shredded pork &amp; pickled mustard green noodles</p> <p><b>Drinks:</b> Coffee with cream and sugar, Juice, Carbonated drinks, Milk shake, Milk tea</p> <p><b>Local Snack:</b><br/>Pot Sticker, Beef (lamb) stew of bread, Chinese bread stuffed with cooked pork, Buckwheat noodles with sesame dressing, Sweets, glutinous millet</p>                                                                                                                                                                                                                                                                                                                                                                                                                                                                                                                                                                                                                                                                                                                                                                                                                                                                                                                                                                                                                                                                                                                             |

2

3

**Low carbohydrate diet guide:**

4

- Avoid all sugars and sweeteners such as white sugar, brown sugar, honey, corn syrup, maple syrup

5

- Avoid all artificial sweeteners such as aspartame

6

- Limit all staple and starchy foods

7

- Use olive oil, suet, coconut oil, butter, lard, palm oil, tallow, tea seed oil for cooking.

8

- Avoid using vegetable seed oils such as canola oil for high heat cooking (cold press is acceptable)

9

- Avoid deep fried food

10

- Use konjac to replace staple and starchy food when possible

11

12

13

**Time-restricted eating guide:**

14

- Most people can fast for a medical procedure such as a fasting blood sugar test. Therefore, it is safe for most people not to eat for 16 hours

15

- When we are busy or occupied, we are less likely to feel hungry

16

- To eat at a certain time is a habit not a necessity

17

18

1 - Drink plenty of fluid

2

3 **Recommended zero calorie beverages:**

4 - Water, mineral water, sparkling water, tea, herbal tea

5 - Absolutely no sweetened drink, especially those with artificial sweeteners

6 Related to STAR Methods.

7

1 Supplemental figures

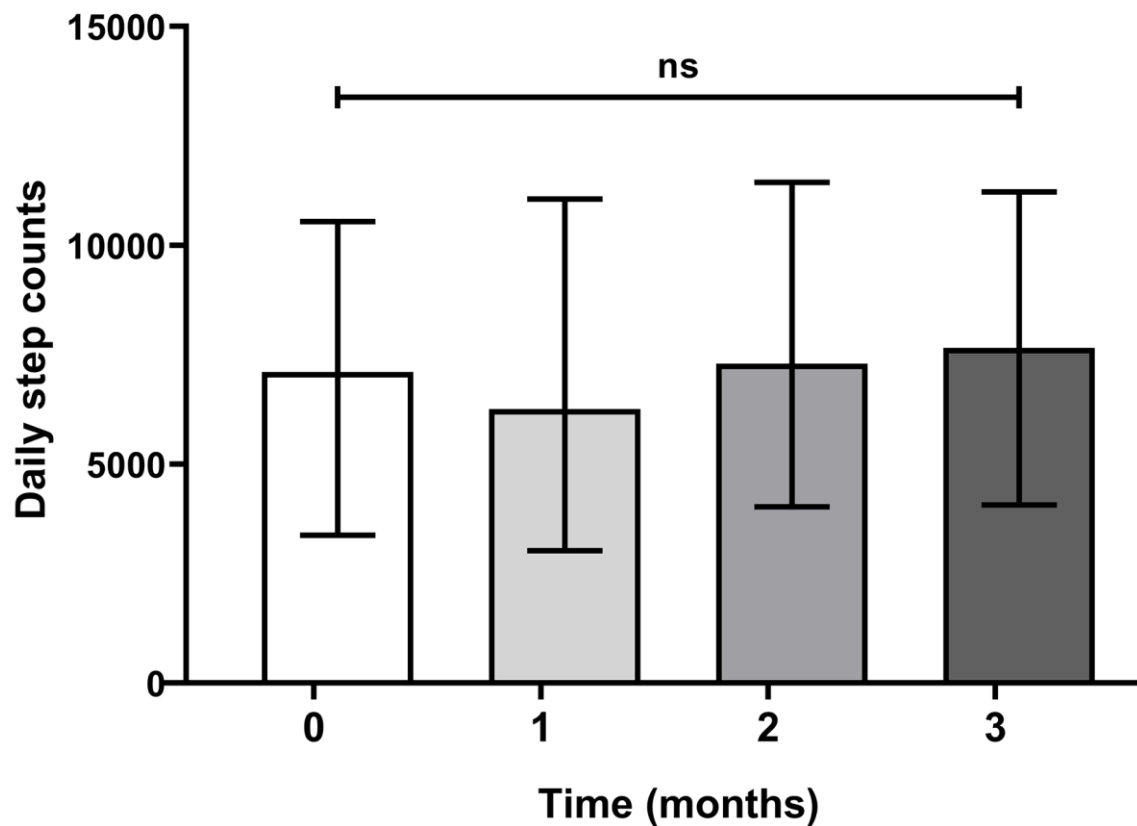

2  
3 **Figure S1. The daily step counts during the intervention period**

4 Data from all participants (n = 162) are presented as median (interquartile range, IQR) for abnormally distributed variables. There were no significant differences  
5 between baseline, 1-month, 2-month, and 3-month follow-up, which were measured by Wilcoxon test. Related to STAR Methods.  
6

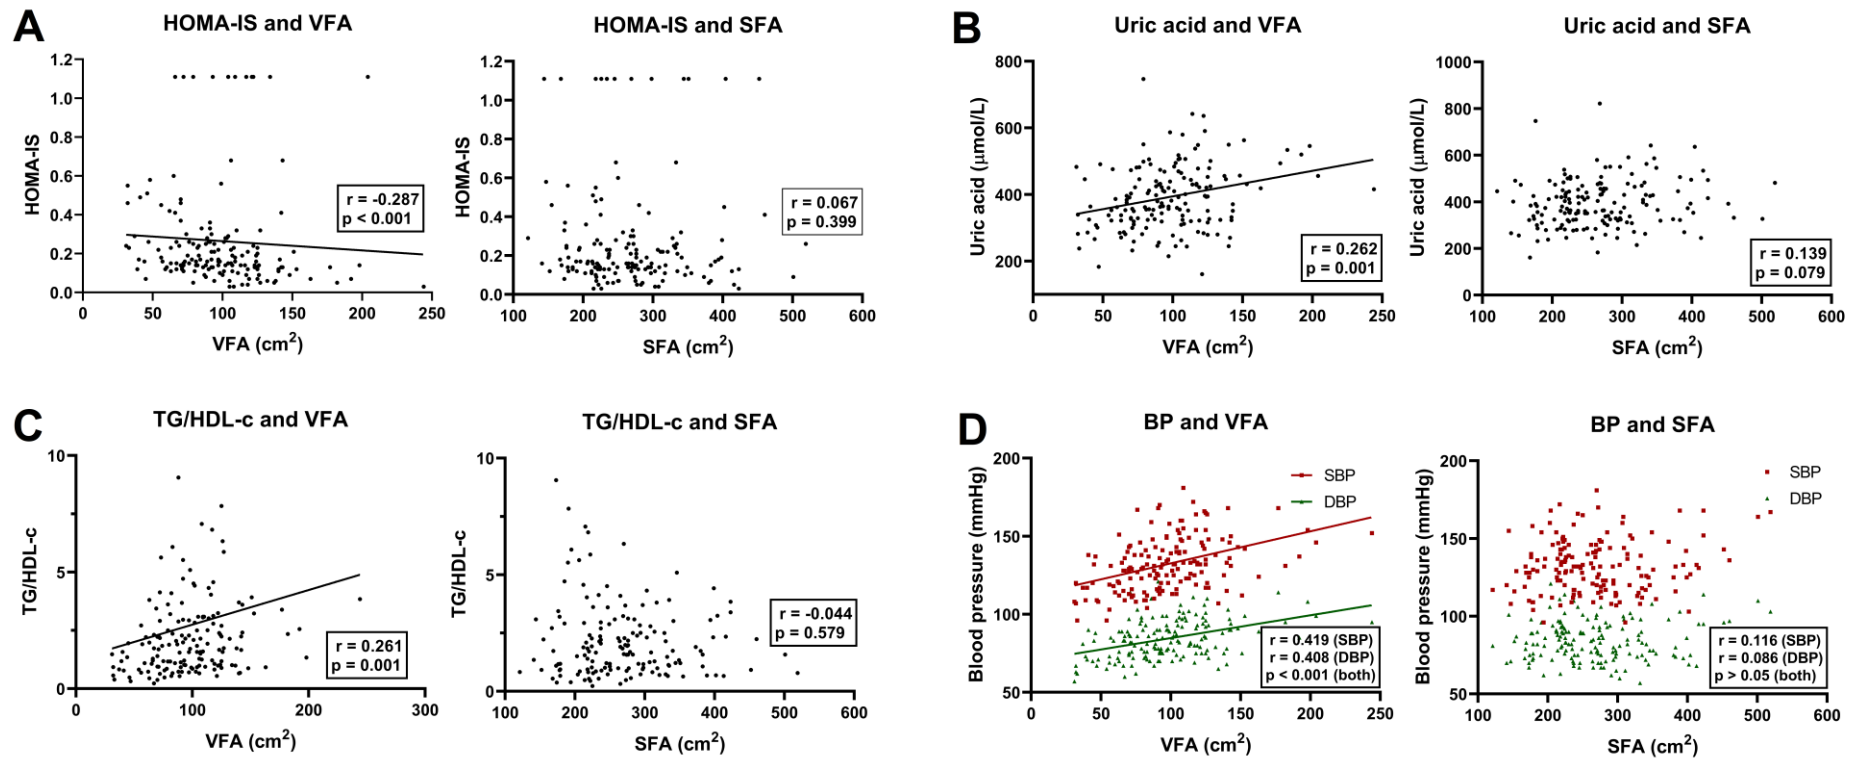

1

2 **Figure S2. The correlation between metabolic factors and abdominal fat area**

3 The correlation between baseline (A) homeostasis model assessment insulin sensitivity (HOMA-IS), (B) uric acid, (C) the ratio between triglycerides and high-  
 4 density lipoprotein cholesterol (TG/HDL-c), (D) systolic and diastolic blood pressure (SBP and DBP), and abdominal fat area (visceral fat area, VFA;  
 5 subcutaneous fat area, SFA). Pearson or Spearman correlations were performed to assess the relationship between abdominal fat area and other metabolic  
 6 risk factors. Each data point represents an individual participant (n = 162). Related to Figure 3.

7

8

1 **Data S1**

2  
3 **Food Frequency Questionnaire (FFQ), related to STAR Methods**

4  
5 1. Days of adherence over the past two weeks: \_\_\_ days

6  
7 2. Mean meal time over the past two weeks

8 First meal started at □□:□□

9 Second meal started at □□:□□ (leave a blank if skipped)

10 Third meal ended at □□:□□

11  
12 3. Food frequency and quantity over the past two weeks

13 • Staple food

14 (1) How often and how much did you eat rice?

15 A Never

16 B \_\_\_ times a day, and \_\_\_ g each time.

17 C \_\_\_ times a week, and \_\_\_ g each time.

18 (2) How often and how much did you eat wheat flour?

19 A Never

20 B \_\_\_ times a day, and \_\_\_ g each time.

21 C \_\_\_ times a week, and \_\_\_ g each time.

22 (3) How often and how much did you eat coarse grain and field crop (corn, oat, sorghum,  
23 etc.)?

24 A Never

25 B \_\_\_ times a day, and \_\_\_ g each time.

26 C \_\_\_ times a week, and \_\_\_ g each time.

27 (4) How often and how much did you eat tuber vegetable (potato, batata, yam, taro, etc.)?

28 A Never

29 B \_\_\_ times a day, and \_\_\_ g each time.

30 C \_\_\_ times a week, and \_\_\_ g each time.

31 (5) How often and how much did you eat starch and derived products (vermicelli, etc.)?

32 A Never

33 B \_\_\_ times a day, and \_\_\_ g each time.

34 C \_\_\_ times a week, and \_\_\_ g each time.

35 • Pastry

36 (1) How often and how much did you eat bread, cake, cookie, etc.?

37 A Never

38 B \_\_\_ times a day, and \_\_\_ g each time.

39 C \_\_\_ times a week, and \_\_\_ g each time.

40 • Meat

41 (1) How often and how much did you eat pork, beef and lamb?

42 A Never

43 B \_\_\_ times a day, and \_\_\_ g each time.

44 C \_\_\_ times a week, and \_\_\_ g each time.

45 (2) How often and how much did you eat processed meat (bacon, sausage, etc.)?

46 A Never

47 B \_\_\_ times a day, and \_\_\_ g each time.

48 C \_\_\_ times a week, and \_\_\_ g each time.

49 (3) How often and how much did you eat animal innards?

50 A Never

51 B \_\_\_ times a day, and \_\_\_ g each time.

52 C \_\_\_ times a week, and \_\_\_ g each time.

53 • Aquatic product

54 (1) How often and how much did you eat fish, crab, shrimp, shellfish, molluscs, etc.?

55 A Never

56 B \_\_\_ times a day, and \_\_\_ g each time.

57 C \_\_\_ times a week, and \_\_\_ g each time.



- 1 ● Poultry  
2 (1) How often and how much did you eat chicken, duck, pigeon, etc.?  
3 A Never  
4 B \_\_\_ times a day, and \_\_\_ g each time.  
5 C \_\_\_ times a week, and \_\_\_ g each time.
- 6 ● Egg  
7 (1) How often and how much did you eat hen's egg, duck's egg, preserved egg, salted egg,  
8 etc.?  
9 A Never  
10 B \_\_\_ times a day, and \_\_\_ g each time.  
11 C \_\_\_ times a week, and \_\_\_ g each time.
- 12 ● Milk and milk products?  
13 (1) How often and how much did you eat milk, yogurt, etc.?  
14 A Never  
15 B \_\_\_ times a day, and \_\_\_ ml each time.  
16 C \_\_\_ times a week, and \_\_\_ ml each time.  
17 (2) How often and how much did you eat milk powder, cheese, etc.?  
18 A Never  
19 B \_\_\_ times a day, and \_\_\_ ml each time.  
20 C \_\_\_ times a week, and \_\_\_ ml each time.
- 21 ● Beans and legume products  
22 (1) How often and how much did you eat soybean?  
23 A Never  
24 B \_\_\_ times a day, and \_\_\_ g each time.  
25 C \_\_\_ times a week, and \_\_\_ g each time.  
26 (2) How often and how much did you eat tofu, soybean curd sheet, soybean curd slab and  
27 oily bean curd?  
28 A Never  
29 B \_\_\_ times a day, and \_\_\_ g each time.  
30 C \_\_\_ times a week, and \_\_\_ g each time.
- 31 ● Vegetables  
32 (1) How often and how much did you eat dark vegetables?  
33 A Never  
34 B \_\_\_ times a day, and \_\_\_ g each time.  
35 C \_\_\_ times a week, and \_\_\_ g each time.  
36 (2) How often and how much did you eat light vegetables?  
37 A Never  
38 B \_\_\_ times a day, and \_\_\_ g each time.  
39 C \_\_\_ times a week, and \_\_\_ g each time.
- 40 ● Phytoomycetes  
41 (1) How often and how much did you eat mushrooms, seaweed, porphyra, etc.?  
42 A Never  
43 B \_\_\_ times a day, and \_\_\_ g each time.  
44 C \_\_\_ times a week, and \_\_\_ g each time.
- 45 ● Fruits  
46 (1) How often and how much did you eat apple, pear, peach, cherry, grapefruit, kiwifruit,  
47 etc.?  
48 A Never  
49 B \_\_\_ times a day, and \_\_\_ g each time.  
50 C \_\_\_ times a week, and \_\_\_ g each time.  
51 (2) How often and how much did you eat mango, pineapple, etc.?  
52 A Never  
53 B \_\_\_ times a day, and \_\_\_ g each time.  
54 C \_\_\_ times a week, and \_\_\_ g each time.  
55 (3) How often and how much did you eat watermelon, etc.?  
56 A Never  
57 B \_\_\_ times a day, and \_\_\_ g each time.

1 C \_\_\_\_ times a week, and \_\_\_\_ g each time.

2 • Nuts

3 (1) How often and how much did you eat peanut, sunflower seed, walnut, pumpkin seed,  
4 etc.?

5 A Never

6 B \_\_\_\_ times a day, and \_\_\_\_ g each time.

7 C \_\_\_\_ times a week, and \_\_\_\_ g each time.

8 • Alcohol

9 (1) How often and how much did you drink low-alcohol liquor ( $\leq 38\%$ )?

10 A Never

11 B \_\_\_\_ times a day, and \_\_\_\_ ml each time.

12 C \_\_\_\_ times a week, and \_\_\_\_ ml each time.

13 (2) How often and how much did you drink high-alcohol liquor ( $>38\%$ )?

14 A Never

15 B \_\_\_\_ times a day, and \_\_\_\_ ml each time.

16 C \_\_\_\_ times a week, and \_\_\_\_ ml each time.

17 (3) How often and how much did you drink beer?

18 A Never

19 B \_\_\_\_ times a day, and \_\_\_\_ ml each time.

20 C \_\_\_\_ times a week, and \_\_\_\_ ml each time.

21 (4) How often and how much did you drink yellow rice wine?

22 A Never

23 B \_\_\_\_ times a day, and \_\_\_\_ ml each time.

24 C \_\_\_\_ times a week, and \_\_\_\_ ml each time.

25 (5) How often and how much did you drink fruit wine?

26 A Never

27 B \_\_\_\_ times a day, and \_\_\_\_ ml each time.

28 C \_\_\_\_ times a week, and \_\_\_\_ ml each time.

29

1 **Data S2**

2

3 **Trial protocol, related to STAR Methods**

4 This is a randomized, open-label, single-centre, clinical trial to evaluate the weight loss efficacy  
5 and improvement of metabolic parameters by low-carbohydrate diet (LCD), time-restricted  
6 feeding (TRF), and their combination in adults with MetS. This study is conducted with approval  
7 from the Institutional Review Board at the First Affiliated Hospital of Xi'an Jiaotong University,  
8 Xi'an, China (No: XJTUAF2020LSK-003). The trial is registered as ClinicalTrials.gov, number  
9 NCT04475822.

10 **Sample size calculation**

11 The study is powered to detect the primary outcome of percentage reduction in body weight.  
12 For the sample size calculation, we estimate that the LCD-treated group (A) would lose 5%  
13 body weight and that the group treated with combination diet (C) would lose 10% body weight  
14 over 3 months. We calculate that n=26 participants per group would provide 80% power to  
15 detect a significant difference of 5% in body weight between the A and C groups by 3 month  
16 using a 2-tailed independent-samples t test with  $\alpha=0.05$ . We anticipate a dropout rate of 20%.  
17 Thus, we initially aim to recruit 99 participants (n=33 per group), assuming that 78 participants  
18 (n=26 per group) would complete the trial. We finally decided to increase the number of recruits  
19 to 165 because of concerns about the high dropout, but also to increase the strength of statistics.

20 **Recruitment**

21 Participants are recruited between July 2020 and September 2020 from Xi'an via emails, flyers,  
22 social media, and website advertisements and are diagnosed with metabolic syndrome (using  
23 AHA/National Heart, Lung, and Blood Institute cutoff points for waist circumference). All  
24 participants should provide written informed consent.

25 **Inclusion criteria**

26 (1) Diagnosed with metabolic syndrome (i.e., more than 3 abnormal findings out of 5):

27 a. Waist circumference  $\geq 90$  cm (men) or  $\geq 80$  cm (women).

28 b. Elevated TG (use of medications for elevated TG is an alternate indicator)  $\geq 150$  mg/dL (1.7  
29 mmol/L).

30 c. Reduced HDL-c (use of medications for reduced HDL-c is an alternate indicator)  $< 40$  mg/dL  
31 (1.0 mmol/L) in males  $< 50$  mg/dL (1.3 mmol/L) in females.

32 d. Elevated blood pressure (use of hypoglycemic medications is an alternate indicator). SBP  $\geq$   
33 130 and/or DBP  $\geq 85$  mmHg.

34 e. Elevated FBG (used of hypoglycemic medications is an alternate indicator)  $\geq 100$  mg/dL (5.6  
35 mmol/L).

36 (2) Age from 18 to 65 years.

37 (3) Stable weight (change  $\leq 10\%$  current body weight) for 3 months prior to the study.

38 (4) If participants were on hypoglycemic medications, hypotensive medications, lipid-lowering  
39 medications and cardiovascular medications, dose adjustment was not permitted during the 3-  
40 month intervention.

41 **Exclusion criteria**

42 1) Pregnant or breast-feeding.

- 1 2) Night shift workers.
- 2 3) History of major diseases or related diseases, such as inflammatory disease, rheumatologic
- 3 disease, adrenal disease, malignancy, type 1 diabetes, cirrhosis, chronic kidney disease,
- 4 acquired immunodeficiency syndrome, eating disorder, uncontrolled psychiatric disorder and
- 5 major adverse cardiovascular event.
- 6 4) Current participate in other weight-management program, current on a prescribed diet for
- 7 special disease or current on any drugs that effect appetite.
- 8 5) History of weight-loss surgery.

## 9 **Randomisation and masking**

10 Participants are randomly divided into LCD, TRF and a combination group at a ratio of 1:1:1  
11 (the formal study is preceded by basic assessment and a two-week window period). Block  
12 randomization is performed by a computer-generated random number list prepared by an  
13 investigator with no clinical involvement in the trial. After the research nurse obtains the patient's  
14 consent, she telephones a clinician who is independent of the recruitment process for allocation  
15 consignment.

## 16 **Procedures**

17 Before commencing the study, all participants are asked to maintain a consistent diet, exercise  
18 and lifestyle during a two-week window period to keep their weight stable. During the 3-months  
19 intervention period, the LCD group is instructed to eat a low-carbohydrate diet (carbohydrates  
20 <130 g/day or <26% total energy, according to the ADA definition of 130 g/day as recommended  
21 minimum). The 8h TRF group is instructed to eat *ad libitum* from 8 am to 4 pm daily and fasting  
22 from 4 pm to 8 am or to eat *ad libitum* from 12 am to 8 pm daily and fasting from 8 pm to 12 am  
23 (16h fast). During the 8h feeding windows, there are no restrictions on the types or quantities  
24 of foods consumed, and the fasting guide is provided in the supplemental materials. Likewise,  
25 the combination group is instructed to eat a LCD in the same 8h feeding windows as the TRF  
26 group. Moreover, participants are not required to monitor their caloric intake during this *ad*  
27 *libitum* feeding period. During the fasting period, participants are encouraged to drink plenty of  
28 water and are permitted to consume energy-free beverages, such as black tea and sparkling  
29 water.

30 The study is conducted with the help of the internet hospital application (app) of the First  
31 Affiliated Hospital of Xi'an Jiaotong University, named "Smart Hospital", which is a new  
32 approach to provide health services, outpatient service in particular, through the internet  
33 technology. All participants could contact clinicians at any time and any place though online  
34 communication and receive diet guides and questionnaires through the app. According to a  
35 previously defined method providing quantitative information on macronutrient composition of  
36 the diet, compliance with the dietary intervention is evaluated by the same dietician every other  
37 week through diet questionnaires. All subjects are asked to maintain their usual physical activity  
38 throughout the study, which is supervised by our own custom-made sport bracelet.

## 39 **Outcomes**

40 The primary outcome of the study is change in body weight and abdominal fat area, and the  
41 secondary outcomes are body composition, glycemic control, plasma lipids, uric acid (UA),  
42 blood pressure and diet adherence.

43 Body weight is assessed every month at the research center with the participants without shoes  
44 and in light clothing using a digital scale (OMRON MEDICAL Beijing Co., Ltd. HNH-318) to the  
45 nearest 0.1 kg. Height is assessed during the screening visit using a wall-mounted stadiometer

1 (OMRON MEDICAL Beijing Co., Ltd. HNH-318) to the nearest 0.1 cm. Abdominal fat area  
2 (visceral fat area, VFA; subcutaneous fat area, SFA) is measured at baseline and after 3  
3 months using bioelectrical impedance analysis (OMRON MEDICAL Beijing Co., Ltd.  
4 DUALSCAN, HDS-2000) to the nearest 1 cm<sup>2</sup>, and body composition (body fat mass and body  
5 muscle mass) is measured at baseline and month 3 using the direct segmental multifrequency  
6 bioelectrical impedance analysis method DSM-BIA (InBody H20) to the nearest 0.1 kg.

7 Blood samples are collected after a 12h fast at week 1 (before starting the intervention) and at  
8 month 3, between 7:40 and 9:00 am. All blood draws are performed at the physical examination  
9 center of the First Affiliated Hospital of Xi'an Jiaotong University. Blood is centrifuged for 20 min  
10 at 520g and 4°C to separate plasma from red cells and stored at -80°C until analysis.  
11 Hemoglobin A1c (HbA1c) is measured on an automatic HbA1c analyzer (TOSOH  
12 BIOSCIENCE, Inc.; HLC-723G8) to the nearest 0.1%. FBG, UA, total cholesterol, TG, HDL-c,  
13 and LDL-c are measured on an automatic biochemistry analyzer (HITACHI, Inc.; LAbOSPECT,  
14 008AS) using standard reagents to the nearest 0.01 mmol/L, 1 μmol/L, 0.01 mmol/L, 0.01  
15 mmol/L, 0.01 mmol/L and 0.01 mmol/L, respectively.

16 Fasting insulin and C-peptide are measured by immunoassay with fluorescent detection on a  
17 Luminox instrument (EMD Millipore Corporation; HMHEMAG-34K) to the nearest 0.1 pg/mL.  
18 Insulin resistance (IR) and insulin sensitivity (IS) is calculated using the homeostasis model  
19 assessment (HOMA) method by applying the following formula: [HOMA-IR=fasting insulin  
20 (mIU/L) × fasting glucose (mg/dL)/405], [HOMA-IS=1/HOMA-IR]. Quantitative insulin-sensitivity  
21 check index (QUICKI)=1/[log (fasting insulin level, in microunits per milliliter) + log (fasting  
22 glucose level, in milligrams per deciliter)]. Blood pressure is measured in triplicate using a digital  
23 automatic blood pressure (Omron HBP-9020, Kyoto, Japan) to the nearest 1 mmHg with the  
24 participant in a seated position after a 10-min rest.

25 Neurological issues (dizziness, headache, fatigue, and irritability) and gastrointestinal issues  
26 (nausea, diarrhea, constipation, and dry mouth) are assessed by a telephone interview at  
27 baseline and every other week during the intervention period.

## 28 **Statistical Analysis Plan**

29 Statistical analyses are performed using SPSS v.25.0 for Windows. A two-tailed p value of less  
30 than 0.05 is considered statistically significant. Tests for normality are conducted. All data are  
31 presented as the mean ± standard deviation (SD) for normally distributed variables or median  
32 (interquartile range, IQR) for abnormally distributed variables. At baseline, differences between  
33 treatment arms (LCD, TRF and combination) are tested by one-way ANOVA or Kruskal-Wallis  
34 H test, with an LSD post hoc test (continuous variables) or McNemar test (categorical variables).  
35 Pearson and Spearman correlations are performed to assess the relationship between  
36 abdominal fat area and other metabolic risk factors. The significant difference between baseline  
37 and 3-month follow-up is measured by paired T test or Wilcoxon test in each group. At month  
38 3, differences across treatment arms (LCD, TRF and combination) are evaluated as change  
39 scores (from baseline to month 3) using one-way ANOVA or Kruskal-Wallis H test, with an LSD  
40 post hoc test (continuous variables) or McNemar test (categorical variables).
